# Supplementary figures and images for: Network of Soil Fungi and the Microfauna Community under Diverse Anthropic Disturbances under Chrysopogon zizanioides Planting in the Reservoir
Source: MDPI journal article supplement (doi:10.3390/plants13030393), 2024-01-29

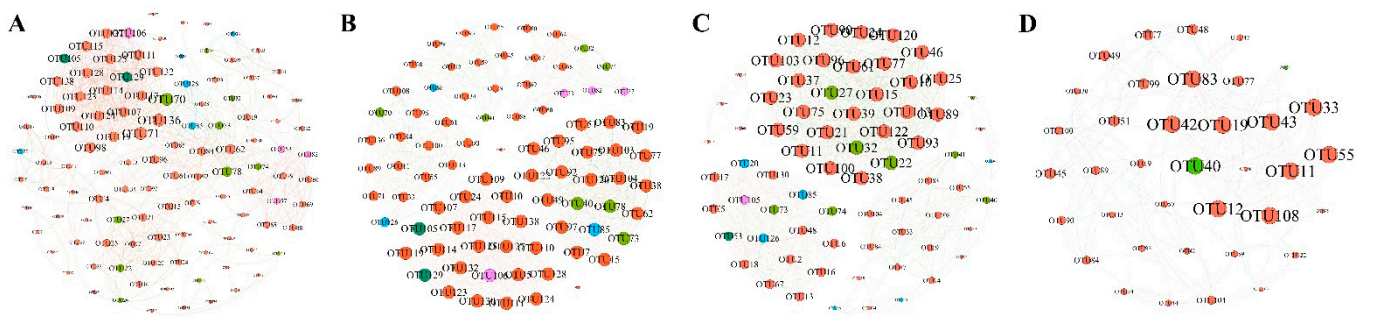

**Figure S1 Co-occurrence networks of based on the dominant kingdom of eukaryotic microbial OTU.**

Supplement: s1 [file s1]
